# Supplementary material
Source: HighWire-hosted journal article supplement (http://www.jneurosci.org/highwire/filestream/599029/field_highwire_adjunct_files/3/Kamprath_SupplFig04.pdf)
Supplement: Kamprath_SupplFig04.pdf [file Kamprath_SupplFig04.pdf]

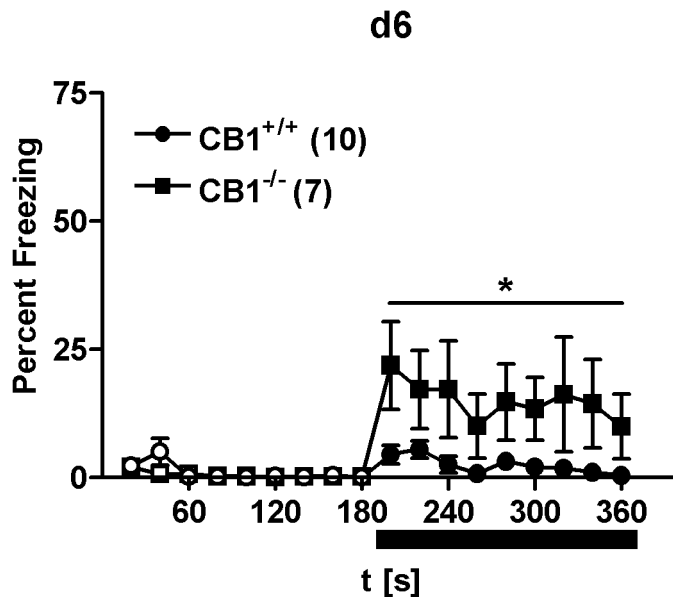

**Supplementary Figure 4: Persistent freezing to a loud tone in CB1<sup>-/-</sup> is unrelated to contextual fear memory.**

Naïve CB1<sup>-/-</sup> and CB1<sup>+/+</sup> (cf. Fig. 5) were exposed to a loud tone of 95 dB at two days (d1, d6). Here we show the freezing response before (open symbols; randomly chosen subset of animals) and during tone presentation at d6 (filled symbols; black bar indicates duration of tone presentation). As revealed by 2-way ANOVAs (*Genotype, Interval*) for repeated measures (*Interval*), CB1<sup>-/-</sup> and CB1<sup>+/+</sup> showed a similar freezing response to the test context before the second presentation of the loud tone (*Genotype*:  $F_{1,15} = 0.9$ ,  $p = 0.352$ ; *Genotype x Interval*:  $F_{8,120} = 1.6$ ,  $p = 0.128$ ). During tone presentation, in contrast, the freezing response was significantly more pronounced in CB1<sup>-/-</sup> than in CB1<sup>+/+</sup> (*Genotype*:  $F_{1,15} = 5.2$ ,  $p = 0.038$ ). A 3-way ANOVA (*Genotype, Tone, Interval*) for repeated measures (*Tone, Interval*) revealed significant effects of *Tone* ( $F_{1,15} = 8.6$ ,  $p = 0.010$ ), a significant *Tone x Genotype* interaction ( $F_{1,15} = 5.8$ ,  $P = 0.029$ ) and a significant effect of *Genotype* ( $F_{1,15} = 4.5$ ;  $p = 0.051$ ). Taken together, these data demonstrate that the first presentation of the loud tone at day 1 does not act as an aversive US that triggers contextual conditioning, which would become evident by an increase in pre-tone freezing at day 6. Moreover, pre-tone freezing appears to be unrelated to the sustained freezing response to the tone of CB1<sup>-/-</sup>. Data were normalized to the 20-s observation intervals. \*  $P < 0.05$  vs. CB1<sup>+/+</sup>
